# Supplementary material
Source: publisher figshare collection journal article supplement (https://acs.figshare.com/ndownloader/files/3804892)
Supplement: Supplementary file 1 [file 3804892]

data_global
_audit_creation_date        "2015-01-19"
_audit_creation_method CRYSTALS_ver_14.61

_oxford_structure_analysis_title  'dan152 in C2/c'
_chemical_name_systematic         ?
_chemical_melting_point           ?

_publ_contact_author_name         'Mihai Barboiu'
_publ_contact_author_address
;
IEM Mntpellier
;

_publ_requested_journal           ''
_publ_section_title
# Title of paper - generally just the systematic or trivial name
; ?
;

# The loop structure below should contain the names and addresses of all
# authors, in the required order of publication. Repeat as necessary.
loop_
 _publ_author_name
 'Mihai Barboiu' # Author 1
 'Dumitrescu Dan'


_publ_section_exptl_refinement
# Some potentially useful phrases are donated by Bill Clegg:
;
Disorder in the C12 chain. One atom could be splitted. It could not 
be clearly decided whether the inversion center in the C2/c space group 
 really exists or not. The inversion center is in the middle of the chain. 
In the disorder model as it is now, the c(31) bonds correctly to c(32,inv), 
but not to c(31,inv), which should mean that the inversion center in 
fact does not exist. 
Refinement in Cc behaved very unstable. Therefore it was decided to keep 
the C2/c model, although it is not completely satisfactory with respect to the 
disorder model. The occupancy of the disordered atoms is necessarily set 
to 0.5 in order to satisfy the (pseudo) inversion center symmetry.

 
 
The H atoms were all located in a difference map, but those 
attached to carbon atoms were repositioned geometrically. 
The H atoms were initially refined with soft restraints on the 
bond lengths and angles to regularise their geometry 
(C---H in the range 0.93--0.98, 
N---H in the range 0.86--0.89 
N---H to 0.86 
O---H = 0.82 
\%A) 
and 
U~iso~(H) (in the range 1.2-1.5 times U~eq~ of the parent atom), 
after which the positions were refined with riding constraints
(Cooper et al, 2010). 
 
Cooper, R. I., Thompson, A. L. & Watkin, D. J. (2010). J. Appl. Cryst. 
43, 1100-1107. 
 
; 
 
data_1 
 
_exptl_special_details 
;
 The crystal was 
placed in the cold stream of an Oxford 
Cryosystems open-flow nitrogen cryostat (Cosier & 
Glazer, 1986) with a nominal stability of 0.1K. 
 
Cosier, J. & Glazer, A.M., 1986. J. Appl. Cryst. 105-107. 
; 
_refine_special_details 
; 
? 
; 
#--------------------------------------------------------------- 
_cell_length_a                    13.4741(3)
_cell_length_b                    14.6965(3)
_cell_length_c                    22.6791(4)
_cell_angle_alpha                 90
_cell_angle_beta                  92.7040(17)
_cell_angle_gamma                 90
_cell_volume                      4485.97(8)
_cell_measurement_reflns_used   11631
_cell_measurement_theta_min     1.7980
_cell_measurement_theta_max     28.9450
_cell_oxdiff_length_a                  13.4702(4) 
_cell_oxdiff_length_b                  14.7012(4)
_cell_oxdiff_length_c                  22.6777(6) 
_cell_oxdiff_angle_alpha               89.970(2) 
_cell_oxdiff_angle_beta                92.667(2) 
_cell_oxdiff_angle_gamma               89.982(2) 
_cell_oxdiff_volume                    4486.0(2) 
 
_symmetry_cell_setting            'monoclinic' 
_symmetry_space_group_name_H-M    'C 2/c ' 
_symmetry_space_group_name_Hall '-C 2yc'
loop_
 _symmetry_equiv_pos_as_xyz
 'x,y,z'
 '-x,-y,-z'
 'x+1/2,y+1/2,z'
 '-x+1/2,-y+1/2,-z'
 'x,-y,z+1/2'
 '-x,y,-z+1/2'
 'x+1/2,-y+1/2,z+1/2'
 '-x+1/2,y+1/2,-z+1/2'

loop_
_atom_type_symbol
_atom_type_scat_dispersion_real
_atom_type_scat_dispersion_imag
_atom_type_scat_Cromer_Mann_a1
_atom_type_scat_Cromer_Mann_b1
_atom_type_scat_Cromer_Mann_a2
_atom_type_scat_Cromer_Mann_b2
_atom_type_scat_Cromer_Mann_a3
_atom_type_scat_Cromer_Mann_b3
_atom_type_scat_Cromer_Mann_a4
_atom_type_scat_Cromer_Mann_b4
_atom_type_scat_Cromer_Mann_c
_atom_type_scat_source  
 C       0.0033   0.0016   2.3100  20.8439   1.0200  10.2075   1.5886   0.5687
   0.8650  51.6512   0.2156 'International Tables Vol C 4.2.6.8 and 6.1.1.4'
 H       0.0000   0.0000   0.4930  10.5109   0.3229  26.1257   0.1402   3.1424
   0.0408  57.7998   0.0030 'International Tables Vol C 4.2.6.8 and 6.1.1.4'
 N       0.0061   0.0033  12.2126   0.0057   3.1322   9.8933   2.0125  28.9975
   1.1663   0.5826 -11.5290 'International Tables Vol C 4.2.6.8 and 6.1.1.4'
 O       0.0106   0.0060   3.0485  13.2771   2.2868   5.7011   1.5463   0.3239
   0.8670  32.9089   0.2508 'International Tables Vol C 4.2.6.8 and 6.1.1.4'
 S       0.1246   0.1234   6.9053   1.4679   5.2034  22.2151   1.4379   0.2536
   1.5863  56.1720   0.8669 'International Tables Vol C 4.2.6.8 and 6.1.1.4'
 
 
_cell_formula_units_Z              4

_chemical_formula_sum    'C30 H60 N12 O16 S4'
_chemical_formula_moiety 'C12 H30 N2, C16 H6 O12 S4, 2(C H8 N5), 4(H2 O)'
_chemical_compound_source                ?
_chemical_formula_weight           973.18
 
 
_cell_measurement_temperature          175
 
_exptl_crystal_description        'prism' 
_exptl_crystal_colour             'yellow' 
_exptl_crystal_size_min           0.150 
_exptl_crystal_size_mid           0.250 
_exptl_crystal_size_max           0.320 
_exptl_absorpt_correction_T_min                   0.91234
_exptl_absorpt_correction_T_max                   1.00000
_exptl_absorpt_correction_type            'multi-scan'
_exptl_absorpt_process_details
;
CrysAlisPro, Agilent Technologies,
Version 1.171.36.24 (release 03-12-2012 CrysAlis171 .NET)
(compiled Dec  3 2012,18:21:49)
Empirical absorption correction using spherical harmonics,
 implemented in SCALE3 ABSPACK scaling algorithm.
;
 
_exptl_crystal_density_diffrn     1.441 
_exptl_crystal_density_meas       ? 
_exptl_crystal_density_method     'not measured' 
# Non-dispersive F(000): 
_exptl_crystal_F_000              2064 
_exptl_absorpt_coefficient_mu     0.291 
_diffrn_radiation_type 'Mo K\a'
_diffrn_radiation_source 'Enhance (Mo) X-ray Source'
_diffrn_radiation_monochromator 'graphite'
_diffrn_measurement_device_type 'Xcalibur, Sapphire3, Gemini'
_diffrn_detector_area_resol_mean 16.0143
 
_diffrn_measurement_device        'Area' 
_diffrn_radiation_wavelength           0.71073
#montpellier_reflns_maxres is minimum d (highest resolution)
#where <I/sigI> <= 2.0
#(Z. Dauter, Acta Cryst. D55, 1703-1717, 1999)
_montpellier_reflns_maxres 0.72
_montpellier_reflns_completeness_maxres    90.34
_montpellier_reflns_redundancy_maxres     5.30

#montpellier_diffrn_reflns_class_completeness_shell is completeness in shell
#montpellier_diffrn_class_reflns_cumul_completeness is cumulative
#completeness to resolution of shell
#Note: completeness percentage takes into account the fact whether
#group is centrosymmetric or not
loop_
_montpellier_diffrn_reflns_class_number
_montpellier_diffrn_reflns_class_d_res_high
_montpellier_diffrn_reflns_class_d_res_low
_montpellier_diffrn_reflns_class_redundancy
_montpellier_diffrn_reflns_class_av_I/uI
_diffrn_reflns_class_av_R_eq
_montpellier_diffrn_reflns_class_completeness_shell
_montpellier_diffrn_reflns_class_cumul_completeness
  0    100.0     1.63      9.5   105.05    0.022     99.8    99.83
  1     1.63     1.29      7.7    43.06    0.032    100.0    99.91
  2     1.29     1.12      6.9    34.39    0.037    100.0    99.94
  3     1.12     1.02      5.6    20.63    0.047    100.0    99.96
  4     1.02     0.95      5.3    15.44    0.063    100.0    99.97
  5     0.95     0.89      4.9    12.21    0.075    100.0    99.97
  6     0.89     0.85      4.5     9.58    0.090    100.0    99.98
  7     0.84     0.81      4.2     8.05    0.101    100.0    99.98
  8     0.81     0.77      2.9     6.28    0.123     94.5    99.33
  9     0.77     0.72      1.5     4.15    0.112     50.0    90.34
#End reflection statistics
_computing_data_collection
;
CrysAlisPro, Agilent Technologies,
Version 1.171.36.24 (release 03-12-2012 CrysAlis171 .NET)
(compiled Dec  3 2012,18:21:49)
;
_computing_cell_refinement
;
CrysAlisPro, Agilent Technologies,
Version 1.171.36.24 (release 03-12-2012 CrysAlis171 .NET)
(compiled Dec  3 2012,18:21:49)
;
_computing_data_reduction
;
CrysAlisPro, Agilent Technologies,
Version 1.171.36.24 (release 03-12-2012 CrysAlis171 .NET)
(compiled Dec  3 2012,18:21:49)
;
_computing_structure_solution     'Superflip (Palatinus & Chapuis, 2007)' 
_computing_structure_refinement   'CRYSTALS (Betteridge et al., 2003)' 
_computing_publication_material   'CRYSTALS (Betteridge et al., 2003)' 
_computing_molecular_graphics     'CAMERON (Watkin et al., 1996)' 
_diffrn_orient_matrix_UB_11      -0.0291737000
_diffrn_orient_matrix_UB_12      -0.0193237000
_diffrn_orient_matrix_UB_13       0.0220383000
_diffrn_orient_matrix_UB_21       0.0427258000
_diffrn_orient_matrix_UB_22      -0.0222518000
_diffrn_orient_matrix_UB_23       0.0124918000
_diffrn_orient_matrix_UB_31       0.0101081000
_diffrn_orient_matrix_UB_32       0.0382006000
_diffrn_orient_matrix_UB_33       0.0184030000
_diffrn_measurement_details
;
#__ type_ start__ end____ width___ exp.time_
  1 omega   37.00   69.00   1.0000   39.0000
omega____ theta____ kappa____ phi______ frames
    -       15.4892  179.0000  120.0000 32

#__ type_ start__ end____ width___ exp.time_
  2 omega  -26.00   70.00   1.0000   39.0000
omega____ theta____ kappa____ phi______ frames
    -       15.4892    0.0000 -150.0000 96

#__ type_ start__ end____ width___ exp.time_
  3 omega   -3.00   80.00   1.0000   39.0000
omega____ theta____ kappa____ phi______ frames
    -       15.4892   38.0000  -90.0000 83

#__ type_ start__ end____ width___ exp.time_
  4 omega  -52.00   32.00   1.0000   39.0000
omega____ theta____ kappa____ phi______ frames
    -       15.4892  -57.0000   90.0000 84

#__ type_ start__ end____ width___ exp.time_
  5 omega  -52.00   33.00   1.0000   39.0000
omega____ theta____ kappa____ phi______ frames
    -       15.4892  -50.0000  155.0000 85

#__ type_ start__ end____ width___ exp.time_
  6 omega  -25.00   23.00   1.0000   39.0000
omega____ theta____ kappa____ phi______ frames
    -      -16.2704  -99.0000  -90.0000 48

#__ type_ start__ end____ width___ exp.time_
  7 omega  -25.00   23.00   1.0000   39.0000
omega____ theta____ kappa____ phi______ frames
    -      -16.2704  -99.0000  120.0000 48

#__ type_ start__ end____ width___ exp.time_
  8 omega  -33.00   51.00   1.0000   39.0000
omega____ theta____ kappa____ phi______ frames
    -      -16.2704   57.0000  -90.0000 84

#__ type_ start__ end____ width___ exp.time_
  9 omega  -25.00   23.00   1.0000   39.0000
omega____ theta____ kappa____ phi______ frames
    -      -16.2704  -99.0000    0.0000 48

;
_diffrn_measurement_method '\w scans'

_diffrn_ambient_temperature        175
_diffrn_reflns_number             30126
_reflns_number_total              5597
_diffrn_reflns_av_R_equivalents   0.033
_diffrn_reflns_av_unetI/netI 0.0393
# Number of reflections without Friedels Law is 0
# Number of reflections with Friedels Law is 5597
# Theoretical number of reflections is about 12368


_diffrn_reflns_theta_min          1.798
_diffrn_reflns_theta_max          29.398
_diffrn_measured_fraction_theta_max 0.903

_diffrn_reflns_theta_full         25.282
_diffrn_measured_fraction_theta_full 1.000


_diffrn_reflns_limit_h_min        -17
_diffrn_reflns_limit_h_max        18
_diffrn_reflns_limit_k_min        -19
_diffrn_reflns_limit_k_max        19
_diffrn_reflns_limit_l_min        -31
_diffrn_reflns_limit_l_max        28
_reflns_limit_h_min               -18
_reflns_limit_h_max               17
_reflns_limit_k_min               0
_reflns_limit_k_max               19
_reflns_limit_l_min               0
_reflns_limit_l_max               31

_oxford_diffrn_Wilson_B_factor    2.28
_oxford_diffrn_Wilson_scale       0.86

_atom_sites_solution_primary      iterative  #heavy,direct,difmap,geom,iterative
# _atom_sites_solution_secondary  difmap
_atom_sites_solution_hydrogens    difmap

_refine_diff_density_min          -0.83 
_refine_diff_density_max          2.74
 
 
# The current dictionary definitions do not cover the 
# situation where the reflections used for refinement were 
# selected by a user-defined sigma threshold 
 
 
# The values actually used during refinement 
_oxford_reflns_threshold_expression_ref     I>2.0\s(I)
_refine_ls_number_reflns          4783 
_refine_ls_number_restraints      2 
_refine_ls_number_parameters      289 
_oxford_refine_ls_R_factor_ref    0.0769 
_refine_ls_wR_factor_ref          0.0684 
_refine_ls_goodness_of_fit_ref    1.1565 
_refine_ls_shift/su_max           0.0030364 
_refine_ls_shift/su_mean          0.0001225 
 
 
# The values computed with all filters except I/sigma 
_oxford_reflns_number_all         5597 
_refine_ls_R_factor_all           0.0871 
_refine_ls_wR_factor_all          0.0751 
 
# The values computed with a 2 sigma cutoff - a la SHELX 
_reflns_threshold_expression      I>2.0\s(I)
_reflns_number_gt                 4783 
_refine_ls_R_factor_gt            0.0769 
_refine_ls_wR_factor_gt           0.0684 
 
# choose from: rm (reference molecule of known chirality), 
# ad (anomolous dispersion - Flack), rmad (rm and ad), 
# syn (from synthesis), unk (unknown) or . (not applicable). 
_chemical_absolute_configuration  '.' 
 
 
_refine_ls_structure_factor_coef  F 
_refine_ls_matrix_type            full
_refine_ls_hydrogen_treatment     constr         #undef, noref, refall,
                                                 # refxyz, refU, constr or mixed
_refine_ls_weighting_scheme       calc 
_refine_ls_weighting_details 
;
 Method, part 1, Chebychev polynomial, (Watkin, 1994, Prince, 1982) 
 [weight] = 1.0/[A~0~*T~0~(x)+A~1~*T~1~(x) ... +A~n-1~]*T~n-1~(x)] 
 where A~i~ are the Chebychev coefficients listed below and x= Fcalc/Fmax 
 Method = Robust Weighting (Prince, 1982) 
 W = [weight] * [1-(deltaF/6*sigmaF)^2^]^2^ 
 A~i~ are: 
 7.46 -1.29 4.33 
;
# Insert your own references if required - in alphabetical order 
_publ_section_references 
; 
Betteridge, P.W., Carruthers, J.R., Cooper, R.I., 
Prout, K. & Watkin, D.J. (2003). J. Appl. Cryst. 36, 1487. 
 
Agilent (2011). CrysAlisPro. 
 
Oxford Diffraction, (2006). Gemini User Manual. 
 
Palatinus, L. & Chapuis, G. (2007). J. Appl. Cryst. 40, 786-790. 
 
Prince, E. 
Mathematical Techniques in Crystallography 
and Materials Science
Springer-Verlag, New York, 1982. 
 
Watkin D.J. (1994). 
Acta Cryst, A50, 411-437. 
 
Watkin, D.J., Prout, C.K. & Pearce, L.J. (1996). CAMERON, Chemical 
Crystallography Laboratory, Oxford, UK. 
; 

# Uequiv = arithmetic mean of Ui i.e. Ueqiv = (U1+U2+U3)/3

# Replace last . with number of unfound hydrogen atoms attached to an atom.

# ..._refinement_flags_... 
# . no refinement constraints           S special position constraint on site
# G rigid group refinement of site      R riding atom
# D distance or angle restraint on site T thermal displacement constraints
# U Uiso or Uij restraint (rigid bond)  P partial occupancy constraint


loop_
_atom_site_label
_atom_site_type_symbol
_atom_site_fract_x
_atom_site_fract_y
_atom_site_fract_z
_atom_site_U_iso_or_equiv
_atom_site_occupancy
_atom_site_adp_type
_atom_site_refinement_flags_posn
_atom_site_refinement_flags_adp
_atom_site_refinement_flags_occupancy
_atom_site_disorder_assembly
_atom_site_disorder_group
_atom_site_attached_hydrogens
S1 S 0.28795(5) 0.88455(4) 0.64256(3) 0.0244 1.0000 Uani . . . . . . 
O2 O 0.2612(2) 0.80042(16) 0.61184(10) 0.0446 1.0000 Uani . . . . . . 
O3 O 0.26417(15) 0.96457(15) 0.60687(9) 0.0318 1.0000 Uani . . . . . . 
O4 O 0.38986(15) 0.88465(16) 0.66605(9) 0.0355 1.0000 Uani . . . . . . 
C5 C 0.21273(18) 0.89132(16) 0.70525(10) 0.0212 1.0000 Uani . . . . . . 
C6 C 0.10788(17) 0.89341(16) 0.69945(10) 0.0188 1.0000 Uani . . . . . . 
C7 C 0.05309(17) 0.89688(15) 0.75211(10) 0.0182 1.0000 Uani . . . . . . 
C8 C 0.10427(18) 0.89818(16) 0.80853(10) 0.0193 1.0000 Uani . . . . . . 
C9 C 0.20898(19) 0.90004(17) 0.81092(10) 0.0217 1.0000 Uani . . . . . . 
C10 C 0.26211(18) 0.89628(17) 0.76001(10) 0.0223 1.0000 Uani . . . . . . 
H101 H 0.3305 0.8966 0.7631 0.0281 1.0000 Uiso R . . . . . 
S11 S 0.27852(5) 0.90915(5) 0.87947(3) 0.0263 1.0000 Uani . . . . . . 
O12 O 0.24898(15) 0.99512(15) 0.90524(8) 0.0338 1.0000 Uani . . . . . . 
O13 O 0.25049(19) 0.83188(18) 0.91537(11) 0.0494 1.0000 Uani . . . . . . 
O14 O 0.38271(15) 0.90820(16) 0.86578(9) 0.0369 1.0000 Uani . . . . . . 
C15 C 0.04658(19) 0.89570(18) 0.86033(10) 0.0234 1.0000 Uani . . . . . . 
C16 C -0.05376(19) 0.89176(18) 0.85643(10) 0.0234 1.0000 Uani . . . . . . 
H161 H -0.0891 0.8876 0.8913 0.0288 1.0000 Uiso R . . . . . 
H151 H 0.0801 0.8958 0.8971 0.0293 1.0000 Uiso R . . . . . 
O17 O 0.14359(16) 0.98444(16) 0.50722(9) 0.0374 1.0000 Uani . . . . . . 
H171 H 0.1859 0.9781 0.5332 0.0581 1.0000 Uiso R . . . . . 
H172 H 0.1740 0.9910 0.4767 0.0580 1.0000 Uiso R . . . . . 
O18 O 0.5203(2) 0.63601(16) 0.51237(11) 0.0472 1.0000 Uani . . . . . . 
N19 N 0.55724(16) 0.82578(15) 0.46739(10) 0.0260 1.0000 Uani . . . . . . 
N20 N 0.65957(17) 0.83661(18) 0.45907(11) 0.0315 1.0000 Uani . . . . . . 
H202 H 0.6874 0.7963 0.4378 0.0402 1.0000 Uiso R . . . . . 
H201 H 0.6963 0.8446 0.4903 0.0401 1.0000 Uiso R . . . . . 
C21 C 0.49632(18) 0.88936(17) 0.44454(11) 0.0223 1.0000 Uani . . . . . . 
N22 N 0.53211(17) 0.96212(16) 0.41894(11) 0.0297 1.0000 Uani . . . . . . 
H222 H 0.4902 1.0010 0.4023 0.0372 1.0000 Uiso R . . . . . 
H221 H 0.5954 0.9678 0.4159 0.0374 1.0000 Uiso R . . . . .
N23 N 0.39887(17) 0.87981(17) 0.44896(12) 0.0322 1.0000 Uani . . . . . . 
N24 N 0.36288(19) 0.80374(18) 0.47930(12) 0.0362 1.0000 Uani . . . . . . 
H241 H 0.3403 0.8115 0.5137 0.0453 1.0000 Uiso R . . . . . 
H242 H 0.3442 0.7567 0.4607 0.0454 1.0000 Uiso R . . . . . 
H231 H 0.3612 0.9232 0.4369 0.0400 1.0000 Uiso R . . . . . 
H191 H 0.5348 0.7760 0.4816 0.0330 1.0000 Uiso R . . . . . 
N25 N 0.4918(3) 0.7411(2) 0.61026(14) 0.0573 1.0000 Uani . . . . . . 
C26 C 0.5411(7) 0.6975(5) 0.6648(3) 0.1257 1.0000 Uani . . . . . . 
C27 C 0.6376(4) 0.6600(4) 0.6671(2) 0.0792 1.0000 Uani . . . . . . 
C28 C 0.6913(3) 0.6436(3) 0.72639(19) 0.0550 1.0000 Uani . . . . . . 
C29 C 0.8014(3) 0.6383(3) 0.71942(16) 0.0496 1.0000 Uani . . . . . . 
C30 C 0.8649(3) 0.6283(3) 0.77582(18) 0.0617 1.0000 Uani D . . . . . 
C31 C 0.9695(4) 0.6598(5) 0.7735(4) 0.0509 0.5000 Uani D . . . . . 
C32 C 0.9678(5) 0.5931(5) 0.7622(4) 0.0698 0.5000 Uani D . . . . . 
H291 H 0.8140 0.5865 0.6944 0.0616 1.0000 Uiso R . . . . . 
H292 H 0.8216 0.6930 0.6997 0.0619 1.0000 Uiso R . . . . . 
H282 H 0.6691 0.5882 0.7441 0.0678 1.0000 Uiso R . . . . . 
H281 H 0.6787 0.6939 0.7519 0.0680 1.0000 Uiso R . . . . . 
H272 H 0.6344 0.6019 0.6472 0.1038 1.0000 Uiso R . . . . . 
H271 H 0.6753 0.7024 0.6445 0.1044 1.0000 Uiso R . . . . . 
H261 H 0.4999 0.6448 0.6701 0.1520 1.0000 Uiso R . . . . . 
H262 H 0.5367 0.7388 0.6983 0.1520 1.0000 Uiso R . . . . . 
H253 H 0.4246 0.7384 0.6117 0.0984 1.0000 Uiso R . . . . . 
H251 H 0.5120 0.7997 0.6099 0.0977 1.0000 Uiso R . . . . . 
H252 H 0.5138 0.7105 0.5784 0.0977 1.0000 Uiso R . . . . . 
H311 H 0.9979 0.6653 0.8125 0.0740 0.5000 Uiso R . . . . . 
H312 H 0.9696 0.7175 0.7546 0.0740 0.5000 Uiso R . . . . . 
H321 H 1.0028 0.5799 0.7985 0.0938 0.5000 Uiso R . . . . . 
H322 H 0.9595 0.5388 0.7397 0.0938 0.5000 Uiso R . . . . . 
H301 H 0.8342 0.6617 0.8058 0.0748 0.5000 Uiso R . . . . . 
H302 H 0.8668 0.5656 0.7860 0.0748 0.5000 Uiso R . . . . . 
H303 H 0.8718 0.6859 0.7945 0.0748 0.5000 Uiso R . . . . . 
H304 H 0.8339 0.5870 0.8014 0.0748 0.5000 Uiso R . . . . . 
H182 H 0.5651 0.5989 0.5162 0.0500 1.0000 Uiso R . . . . . 
H181 H 0.4663 0.6075 0.5102 0.0500 1.0000 Uiso R . . . . . 
loop_
_atom_site_aniso_label
_atom_site_aniso_U_11
_atom_site_aniso_U_22
_atom_site_aniso_U_33
_atom_site_aniso_U_23
_atom_site_aniso_U_13
_atom_site_aniso_U_12
S1 0.0246(3) 0.0278(3) 0.0219(3) -0.0023(2) 0.0115(2) -0.0018(2) 
O2 0.0624(16) 0.0368(12) 0.0367(11) -0.0176(9) 0.0244(11) -0.0104(10) 
O3 0.0264(10) 0.0411(11) 0.0285(9) 0.0072(8) 0.0072(7) -0.0030(8) 
O4 0.0242(10) 0.0490(13) 0.0344(10) 0.0044(9) 0.0115(8) 0.0063(9) 
C5 0.0224(11) 0.0214(11) 0.0204(11) -0.0032(9) 0.0086(9) -0.0044(9) 
C6 0.0211(11) 0.0192(10) 0.0166(10) -0.0027(8) 0.0052(8) -0.0017(8) 
C7 0.0227(12) 0.0159(10) 0.0164(10) -0.0008(8) 0.0049(8) -0.0026(8) 
C8 0.0216(11) 0.0198(11) 0.0168(10) -0.0023(8) 0.0046(8) -0.0045(8) 
C9 0.0241(12) 0.0231(11) 0.0180(10) -0.0042(9) 0.0014(8) -0.0079(9) 
C10 0.0194(11) 0.0240(12) 0.0239(11) -0.0050(9) 0.0054(9) -0.0071(9) 
S11 0.0256(3) 0.0319(3) 0.0213(3) -0.0025(2) -0.0019(2) -0.0127(2) 
O12 0.0318(10) 0.0452(12) 0.0247(9) -0.0140(8) 0.0048(8) -0.0133(9) 
O13 0.0509(14) 0.0510(14) 0.0443(13) 0.0180(11) -0.0213(11) -0.0268(11) 
O14 0.0251(10) 0.0470(12) 0.0380(11) -0.0143(9) -0.0037(8) -0.0082(9) 
C15 0.0277(12) 0.0290(12) 0.0138(10) -0.0015(9) 0.0034(8) -0.0020(10) 
C16 0.0273(12) 0.0282(12) 0.0150(10) 0.0002(9) 0.0059(9) 0.0012(9) 
O17 0.0359(11) 0.0507(13) 0.0260(10) 0.0084(9) 0.0057(8) 0.0034(9) 
O18 0.0536(15) 0.0373(12) 0.0515(14) 0.0060(10) 0.0108(11) 0.0169(11) 
N19 0.0234(11) 0.0252(11) 0.0294(11) 0.0078(9) 0.0016(8) 0.0057(8) 
N20 0.0235(11) 0.0396(13) 0.0315(12) 0.0041(10) 0.0014(9) 0.0114(9) 
C21 0.0227(11) 0.0224(11) 0.0217(11) 0.0024(9) -0.0006(8) 0.0016(9) 
N22 0.0219(11) 0.0295(11) 0.0375(12) 0.0124(10) -0.0002(9) 0.0023(9) 
N23 0.0205(11) 0.0301(12) 0.0459(14) 0.0108(10) 0.0010(9) 0.0013(9)
N24 0.0318(13) 0.0322(12) 0.0453(14) 0.0052(11) 0.0093(11) -0.0061(10) 
N25 0.069(2) 0.0551(19) 0.0484(17) -0.0110(15) 0.0064(15) 0.0190(16) 
C26 0.163(7) 0.095(5) 0.112(5) -0.049(4) -0.070(5) 0.068(5) 
C27 0.071(3) 0.086(4) 0.081(3) -0.036(3) -0.001(3) 0.034(3) 
C28 0.066(3) 0.0387(19) 0.060(2) -0.0138(17) 0.0063(19) 0.0112(17) 
C29 0.070(2) 0.0357(17) 0.0437(18) 0.0045(14) 0.0104(17) -0.0097(16) 
C30 0.077(3) 0.063(3) 0.046(2) 0.0127(18) 0.0048(19) -0.029(2) 
C31 0.072(5) 0.026(3) 0.056(4) -0.012(3) 0.015(4) -0.006(3) 
C32 0.116(11) 0.033(4) 0.057(6) 0.020(4) -0.028(5) -0.025(4) 

_refine_ls_extinction_method 
    'None'
_oxford_refine_ls_scale 1.590(3) 
loop_
 _geom_bond_atom_site_label_1
 _geom_bond_site_symmetry_1
 _geom_bond_atom_site_label_2
 _geom_bond_site_symmetry_2
 _geom_bond_distance
 _geom_bond_publ_flag
S1 . O2 . 1.456(2)    yes
S1 . O3 . 1.455(2)    yes
S1 . O4 . 1.449(2)    yes
S1 . C5 . 1.787(2)    yes
C5 . C6 . 1.413(3)    yes
C5 . C10 . 1.383(3)    yes
C6 . C16 6_556 1.432(3)    yes
C6 . C7 . 1.434(3)    yes
C7 . C7 6_556 1.429(5)    yes
C7 . C8 . 1.425(3)    yes
C8 . C9 . 1.410(3)    yes
C8 . C15 . 1.439(3)    yes
C9 . C10 . 1.388(3)    yes
C9 . S11 . 1.782(2)    yes
C10 . H101 . 0.921    no
S11 . O12 . 1.455(2)    yes
S11 . O13 . 1.457(2)    yes
S11 . O14 . 1.452(2)    yes
C15 . C16 . 1.352(4)    yes
C15 . H151 . 0.929    no
C16 . H161 . 0.943    no
O17 . H171 . 0.807    no
O17 . H172 . 0.828    no
O18 . H182 . 0.815    no
O18 . H181 . 0.838    no
N19 . N20 . 1.409(3)    yes
N19 . C21 . 1.332(3)    yes
N19 . H191 . 0.860    no
N20 . H202 . 0.861    no
N20 . H201 . 0.852    no
C21 . N22 . 1.319(3)    yes
C21 . N23 . 1.329(3)    yes
N22 . H222 . 0.875    no
N22 . H221 . 0.862    no
N23 . N24 . 1.411(3)    yes
N23 . H231 . 0.852    no
N24 . H241 . 0.859    no
N24 . H242 . 0.842    no
N25 . C26 . 1.516(7)    yes
N25 . H253 . 0.909    no
N25 . H251 . 0.904    no
N25 . H252 . 0.913    no
C26 . C27 . 1.412(9)    yes
C26 . H261 . 0.964    no
C26 . H262 . 0.976    no
C27 . C28 . 1.517(7)    yes
C27 . H272 . 0.965    no
C27 . H271 . 0.965    no
C28 . C29 . 1.501(6)    yes
C28 . H282 . 0.962    no
C28 . H281 . 0.959    no
C29 . C30 . 1.512(6)    yes
C29 . H291 . 0.969    no
C29 . H292 . 0.965    no
C30 . C31 . 1.486(4)    yes
C30 . C32 . 1.524(5)    yes
C30 . H301 . 0.950    no
C30 . H302 . 0.950    no
C30 . H303 . 0.950    no
C30 . H304 . 0.950    no
C31 . C32 6_756 1.546(10)    yes
C31 . C31 6_756 1.375(13)    yes
C31 . C32 . 1.012(10)    yes
C31 . H311 . 0.950    no
C31 . H312 . 0.950    no
C32 . H322 6_756 1.266    no
C32 . C32 6_756 1.051(13)    yes
C32 . H321 . 0.950    no
C32 . H322 . 0.950    no
H301 . H303 . 0.679    no
H302 . H304 . 0.657    no
loop_
 _geom_angle_atom_site_label_1
 _geom_angle_site_symmetry_1
 _geom_angle_atom_site_label_2
 _geom_angle_site_symmetry_2
 _geom_angle_atom_site_label_3
 _geom_angle_site_symmetry_3
 _geom_angle
 _geom_angle_publ_flag
O2 . S1 . O3 . 112.16(14)    yes
O2 . S1 . O4 . 112.67(15)    yes
O3 . S1 . O4 . 112.57(12)    yes
O2 . S1 . C5 . 106.92(12)    yes
O3 . S1 . C5 . 106.22(12)    yes
O4 . S1 . C5 . 105.70(12)    yes
S1 . C5 . C6 . 121.95(18)    yes
S1 . C5 . C10 . 116.77(18)    yes
C6 . C5 . C10 . 121.3(2)    yes
C16 6_556 C6 . C5 . 123.2(2)    yes
C16 6_556 C6 . C7 . 118.5(2)    yes
C5 . C6 . C7 . 118.4(2)    yes
C6 . C7 . C7 6_556 119.8(3)    yes
C6 . C7 . C8 . 120.1(2)    yes
C7 6_556 C7 . C8 . 120.0(3)    yes
C7 . C8 . C9 . 118.4(2)    yes
C7 . C8 . C15 . 118.4(2)    yes
C9 . C8 . C15 . 123.2(2)    yes
C8 . C9 . C10 . 121.5(2)    yes
C8 . C9 . S11 . 121.27(18)    yes
C10 . C9 . S11 . 117.27(19)    yes
C9 . C10 . C5 . 120.3(2)    yes
C9 . C10 . H101 . 119.4    no
C5 . C10 . H101 . 120.4    no
C9 . S11 . O12 . 105.84(12)    yes
C9 . S11 . O13 . 106.82(12)    yes
O12 . S11 . O13 . 111.66(15)    yes
C9 . S11 . O14 . 106.65(12)    yes
O12 . S11 . O14 . 112.31(12)    yes
O13 . S11 . O14 . 112.99(16)    yes
C8 . C15 . C16 . 121.6(2)    yes
C8 . C15 . H151 . 118.3    no
C16 . C15 . H151 . 120.1    no
C6 6_556 C16 . C15 . 121.5(2)    yes
C6 6_556 C16 . H161 . 119.1    no
C15 . C16 . H161 . 119.4    no
H171 . O17 . H172 . 105.4    no
H182 . O18 . H181 . 108.0    no
N20 . N19 . C21 . 117.2(2)    yes
N20 . N19 . H191 . 120.6    no
C21 . N19 . H191 . 121.5    no
N19 . N20 . H202 . 116.9    no
N19 . N20 . H201 . 116.0    no
H202 . N20 . H201 . 107.9    no
N19 . C21 . N22 . 120.6(2)    yes
N19 . C21 . N23 . 119.3(2)    yes
N22 . C21 . N23 . 120.1(2)    yes
C21 . N22 . H222 . 118.5    no
C21 . N22 . H221 . 119.8    no
H222 . N22 . H221 . 121.4    no
C21 . N23 . N24 . 119.0(2)    yes
C21 . N23 . H231 . 118.2    no
N24 . N23 . H231 . 122.5    no
N23 . N24 . H241 . 118.9    no
N23 . N24 . H242 . 120.5    no
H241 . N24 . H242 . 117.0    no
C26 . N25 . H253 . 110.5    no
C26 . N25 . H251 . 106.9    no
H253 . N25 . H251 . 110.0    no
C26 . N25 . H252 . 107.0    no
H253 . N25 . H252 . 111.6    no
H251 . N25 . H252 . 110.7    no
N25 . C26 . C27 . 124.2(7)    yes
N25 . C26 . H261 . 102.0    no
C27 . C26 . H261 . 102.5    no
N25 . C26 . H262 . 109.4    no
C27 . C26 . H262 . 107.6    no
H261 . C26 . H262 . 110.2    no
C26 . C27 . C28 . 119.7(5)    yes
C26 . C27 . H272 . 107.8    no
C28 . C27 . H272 . 106.4    no
C26 . C27 . H271 . 103.5    no
C28 . C27 . H271 . 109.4    no
H272 . C27 . H271 . 109.8    no
C27 . C28 . C29 . 110.3(4)    yes
C27 . C28 . H282 . 111.0    no
C29 . C28 . H282 . 109.2    no
C27 . C28 . H281 . 108.8    no
C29 . C28 . H281 . 107.9    no
H282 . C28 . H281 . 109.5    no
C28 . C29 . C30 . 116.0(3)    yes
C28 . C29 . H291 . 107.7    no
C30 . C29 . H291 . 108.1    no
C28 . C29 . H292 . 107.9    no
C30 . C29 . H292 . 108.1    no
H291 . C29 . H292 . 108.9    no
C29 . C30 . C31 . 116.1(4)    yes
C29 . C30 . C32 . 110.2(5)    yes
C31 . C30 . C32 . 39.3(4)    yes
C29 . C30 . H301 . 107.9    no
C31 . C30 . H301 . 108.1    no
C32 . C30 . H301 . 138.8    no
C29 . C30 . H302 . 108.0    no
C31 . C30 . H302 . 107.2    no
C32 . C30 . H302 . 73.0    no
H301 . C30 . H302 . 109.5    no
C29 . C30 . H303 . 109.3    no
C31 . C30 . H303 . 70.5    no
C32 . C30 . H303 . 108.9    no
H301 . C30 . H303 . 41.9    no
H302 . C30 . H303 . 139.0    no
C29 . C30 . H304 . 109.3    no
C31 . C30 . H304 . 131.8    no
C32 . C30 . H304 . 109.8    no
H301 . C30 . H304 . 70.9    no
H302 . C30 . H304 . 40.4    no
H303 . C30 . H304 . 109.5    no
C32 6_756 C31 . C30 . 111.3(6)    yes
C32 6_756 C31 . C31 6_756 40.0(4)    yes
C30 . C31 . C31 6_756 129.0(8)    yes
C32 6_756 C31 . C32 . 42.4(6)    yes
C30 . C31 . C32 . 72.4(4)    yes
C31 6_756 C31 . C32 . 79.1(6)    yes
C32 6_756 C31 . H311 . 109.6    no
C30 . C31 . H311 . 109.5    no
C31 6_756 C31 . H311 . 119.5    no
C32 . C31 . H311 . 108.8    no
C32 6_756 C31 . H312 . 108.5    no
C30 . C31 . H312 . 108.4    no
C31 6_756 C31 . H312 . 68.8    no
C32 . C31 . H312 . 138.6    no
H311 . C31 . H312 . 109.5    no
C31 6_756 C32 . C30 . 114.6(5)    yes
C31 6_756 C32 . H322 6_756 86.5    no
C30 . C32 . H322 6_756 158.9    no
C31 6_756 C32 . C32 6_756 40.5(4)    yes
C30 . C32 . C32 6_756 152.7(9)    yes
H322 6_756 C32 . C32 6_756 47.3    no
C31 6_756 C32 . C31 . 60.9(7)    yes
C30 . C32 . C31 . 68.3(4)    yes
H322 6_756 C32 . C31 . 127.5    no
C32 6_756 C32 . C31 . 97.1(5)    yes
C31 6_756 C32 . H321 . 108.7    no
C30 . C32 . H321 . 108.2    no
H322 6_756 C32 . H321 . 63.0    no
C32 6_756 C32 . H321 . 93.7    no
C31 . C32 . H321 . 88.5    no
C31 6_756 C32 . H322 . 107.8    no
C30 . C32 . H322 . 108.0    no
H322 6_756 C32 . H322 . 61.6    no
C32 6_756 C32 . H322 . 78.3    no
C31 . C32 . H322 . 161.6    no
H321 . C32 . H322 . 109.5    no
C32 . H322 . C32 6_756 54.4    no
C30 . H301 . H303 . 69.1    no
C30 . H302 . H304 . 69.8    no
H301 . H303 . C30 . 69.1    no
H302 . H304 . C30 . 69.8    no
loop_
 _geom_hbond_atom_site_label_D
 _geom_hbond_site_symmetry_D
 _geom_hbond_atom_site_label_H
 _geom_hbond_site_symmetry_H
 _geom_hbond_atom_site_label_A
 _geom_hbond_site_symmetry_A
 _geom_hbond_angle_DHA
 _geom_hbond_distance_DH
 _geom_hbond_distance_HA
 _geom_hbond_distance_DA
 _geom_hbond_publ_flag
C15 . H151 . O13 . 123.56(8) 0.929 2.497 3.109(6)    yes
O17 . H171 . O3 . 167.76(8) 0.807 1.942 2.736(6)    yes
O17 . H172 . O12 5_574 178.53(8) 0.828 1.959 2.787(6)    yes
N20 . H202 . O13 7_564 158.20(10) 0.861 2.138 2.954(6)    yes
N20 . H201 . O13 6_656 158.79(10) 0.852 2.232 3.042(6)    yes
N22 . H222 . O14 5_574 176.50(9) 0.875 2.111 2.985(6)    yes
N22 . H221 . O3 2_676 156.74(8) 0.862 2.220 3.031(6)    yes
N24 . H241 . O2 . 167.99(8) 0.859 2.517 3.362(6)    yes
N24 . H242 . O2 4_566 145.53(9) 0.842 2.282 3.014(6)    yes
N23 . H231 . O12 5_574 167.47(10) 0.852 2.035 2.873(6)    yes
N19 . H191 . O18 . 163.65(9) 0.860 2.184 3.019(6)    yes
C27 . H271 . O13 6_656 170.51(11) 0.965 2.568 3.523(6)    yes
N25 . H253 . O2 . 154.97(11) 0.909 2.383 3.229(6)    yes
N25 . H251 . O14 6_656 152.13(10) 0.904 2.188 3.017(6)    yes
N25 . H252 . O18 . 163.18(15) 0.913 1.859 2.746(6)    yes
O18 . H182 . O17 3_545 160.55(10) 0.815 2.003 2.785(6)    yes
O18 . H181 . O17 4_566 165.09(9) 0.838 2.030 2.848(6)    yes


_iucr_refine_instructions_details
;
#
# Punched on 19/01/15 at 16:46:24
#
#LIST     12                                                                    
BLOCK SCALE X'S  U'S 
RIDE C   (  10,X'S) H   ( 101,X'S) 
RIDE C   (  15,X'S) H   ( 151,X'S) 
RIDE C   (  16,X'S) H   ( 161,X'S) 
RIDE O   (  17,X'S) H   ( 171,X'S) H   ( 172,X'S) 
RIDE O   (  18,X'S) H   ( 181,X'S) H   ( 182,X'S) 
RIDE N   (  19,X'S) H   ( 191,X'S) 
RIDE N   (  20,X'S) H   ( 202,X'S) H   ( 201,X'S) 
RIDE N   (  22,X'S) H   ( 222,X'S) H   ( 221,X'S) 
RIDE N   (  23,X'S) H   ( 231,X'S) 
RIDE N   (  24,X'S) H   ( 241,X'S) H   ( 242,X'S) 
RIDE N   (  25,X'S) H   ( 253,X'S) H   ( 251,X'S) H   ( 252,X'S) 
RIDE C   (  26,X'S) H   ( 261,X'S) H   ( 262,X'S) 
RIDE C   (  27,X'S) H   ( 272,X'S) H   ( 271,X'S) 
RIDE C   (  28,X'S) H   ( 282,X'S) H   ( 281,X'S) 
RIDE C   (  29,X'S) H   ( 291,X'S) H   ( 292,X'S) 
RIDE C   (  30,X'S) H   ( 303,X'S) H   ( 304,X'S) H(301,X'S) H(302,X'S) 
RIDE C   (  31,X'S) H   ( 311,X'S) H   ( 312,X'S) 
RIDE C   (  32,X'S) H   ( 322,X'S) H   ( 321,X'S) 
END                                                                             
#
# Punched on 19/01/15 at 16:46:24
#
#LIST     16                                                                    
NO 
REM   HREST   START (DO NOT REMOVE THIS LINE) 
DIST 1.50,0.005 = C(30) TO C(31), C(30) TO C(32) 
REM   HREST   END (DO NOT REMOVE THIS LINE) 
END                                                                             
;
